# Supplementary material for: DNA Display III. Solid-Phase Organic Synthesis on Unprotected DNA
Source: PubMed Central journal article supplement (PMC434150; doi:10.1371/journal.pbio.0020175), 2004-06-22

A

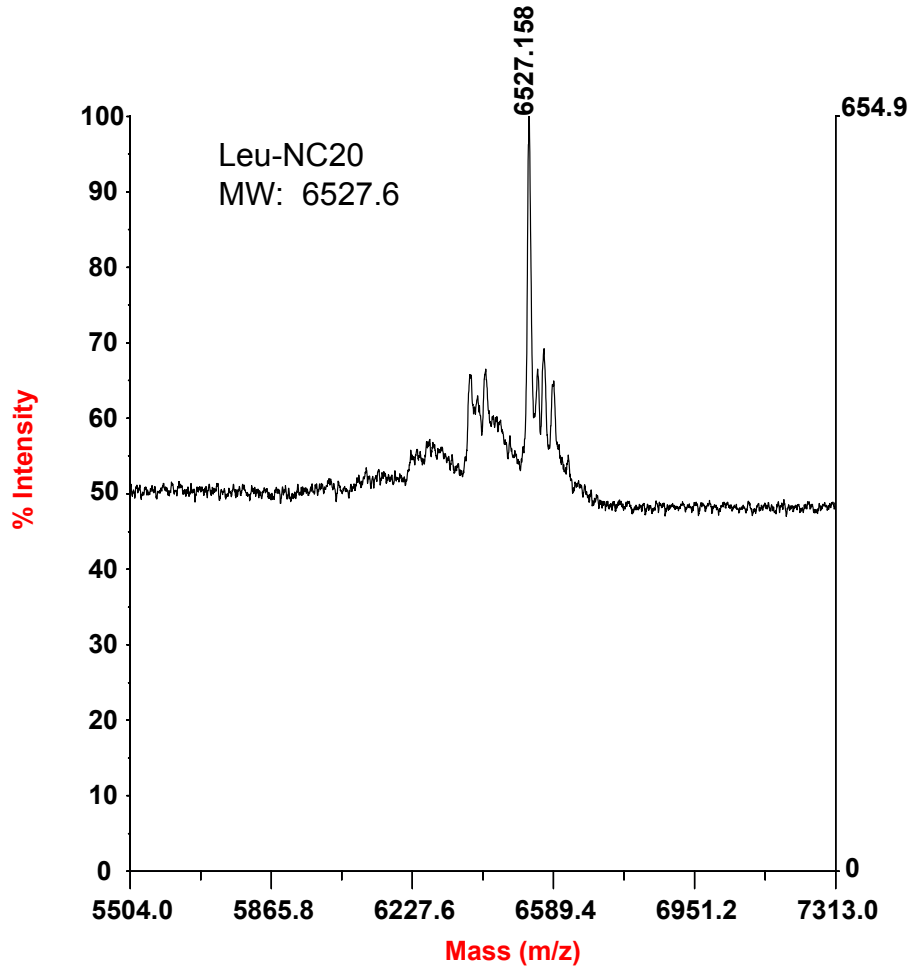

B

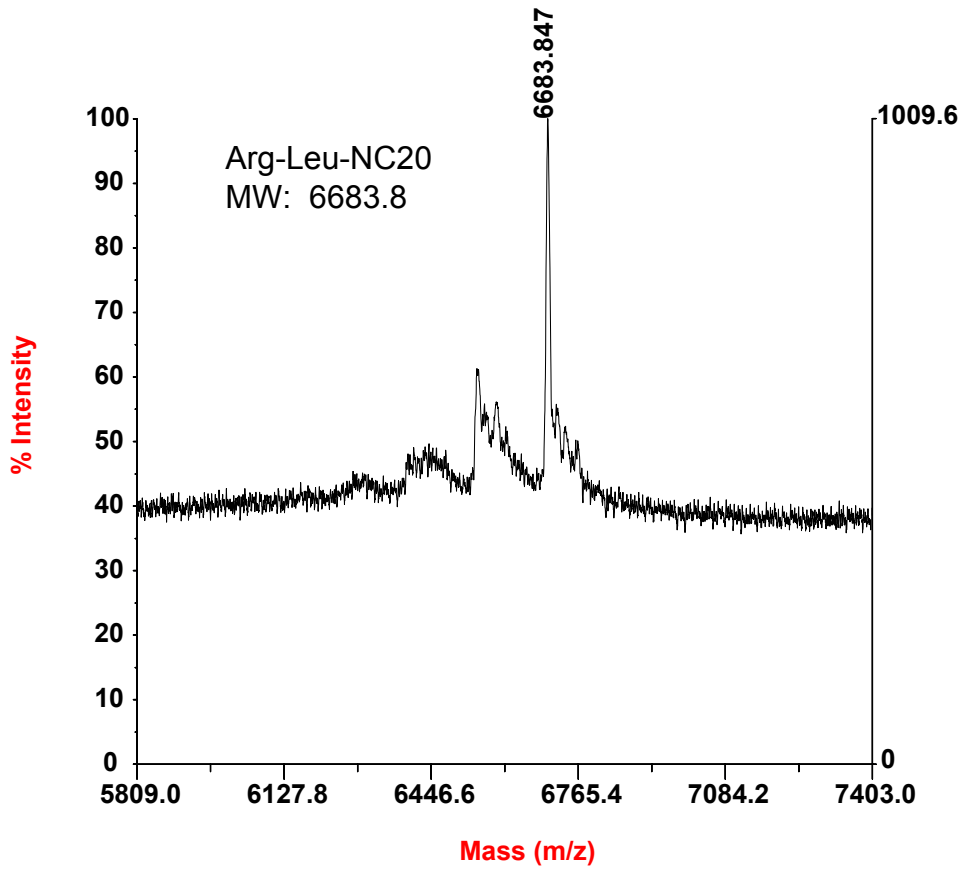

Supplement: pbio.0020175.sg001.pdf [file pbio.0020175.sg001.pdf]
