# Supplementary material for: DNA Display III. Solid-Phase Organic Synthesis on Unprotected DNA
Source: PubMed Central journal article supplement (PMC434150; doi:10.1371/journal.pbio.0020175), 2004-06-22

**A**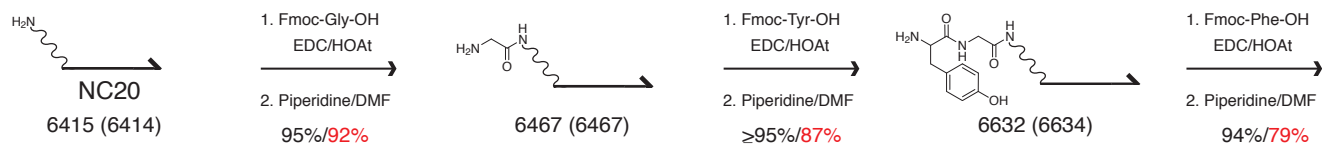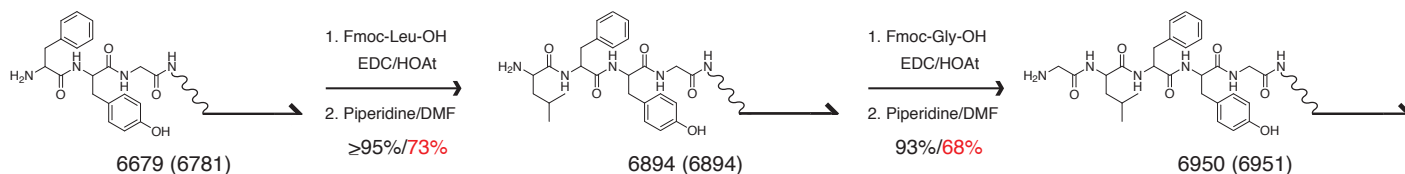**B**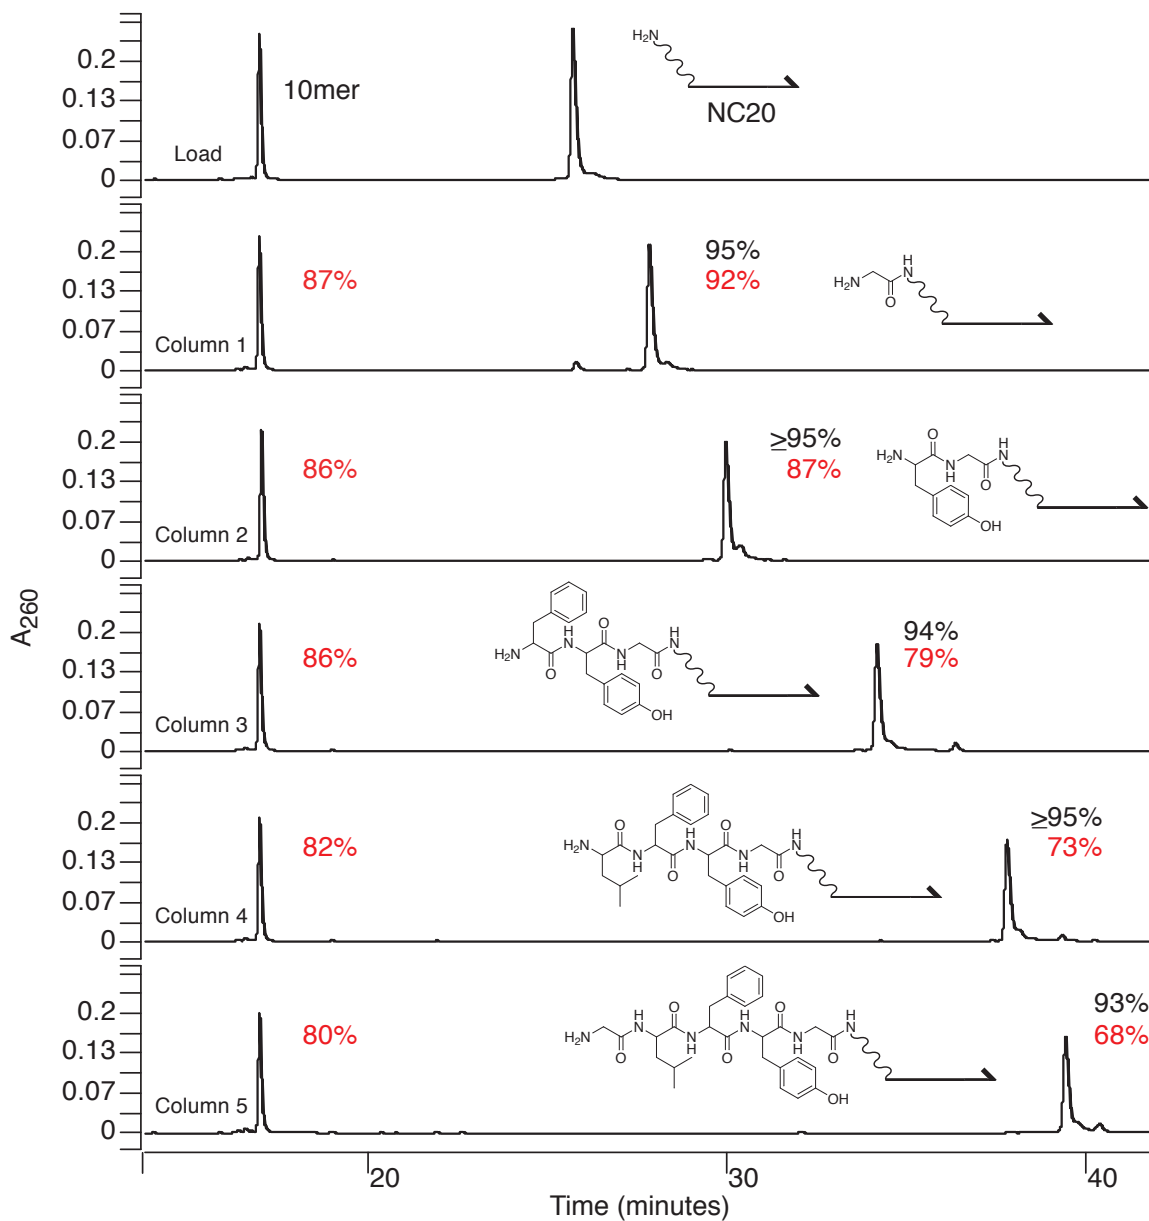

Supplement: pbio.0020175.sg002.pdf [file pbio.0020175.sg002.pdf]
